# Supplementary material for: Aerobic exercise improves motor dysfunction in Parkinson's model mice via differential regulation of striatal medium spiny neuron
Source: PubMed Central journal article supplement (PMC11130133; doi:10.1038/s41598-024-63045-4), 2024-05-27

**APO rotate (30min)**

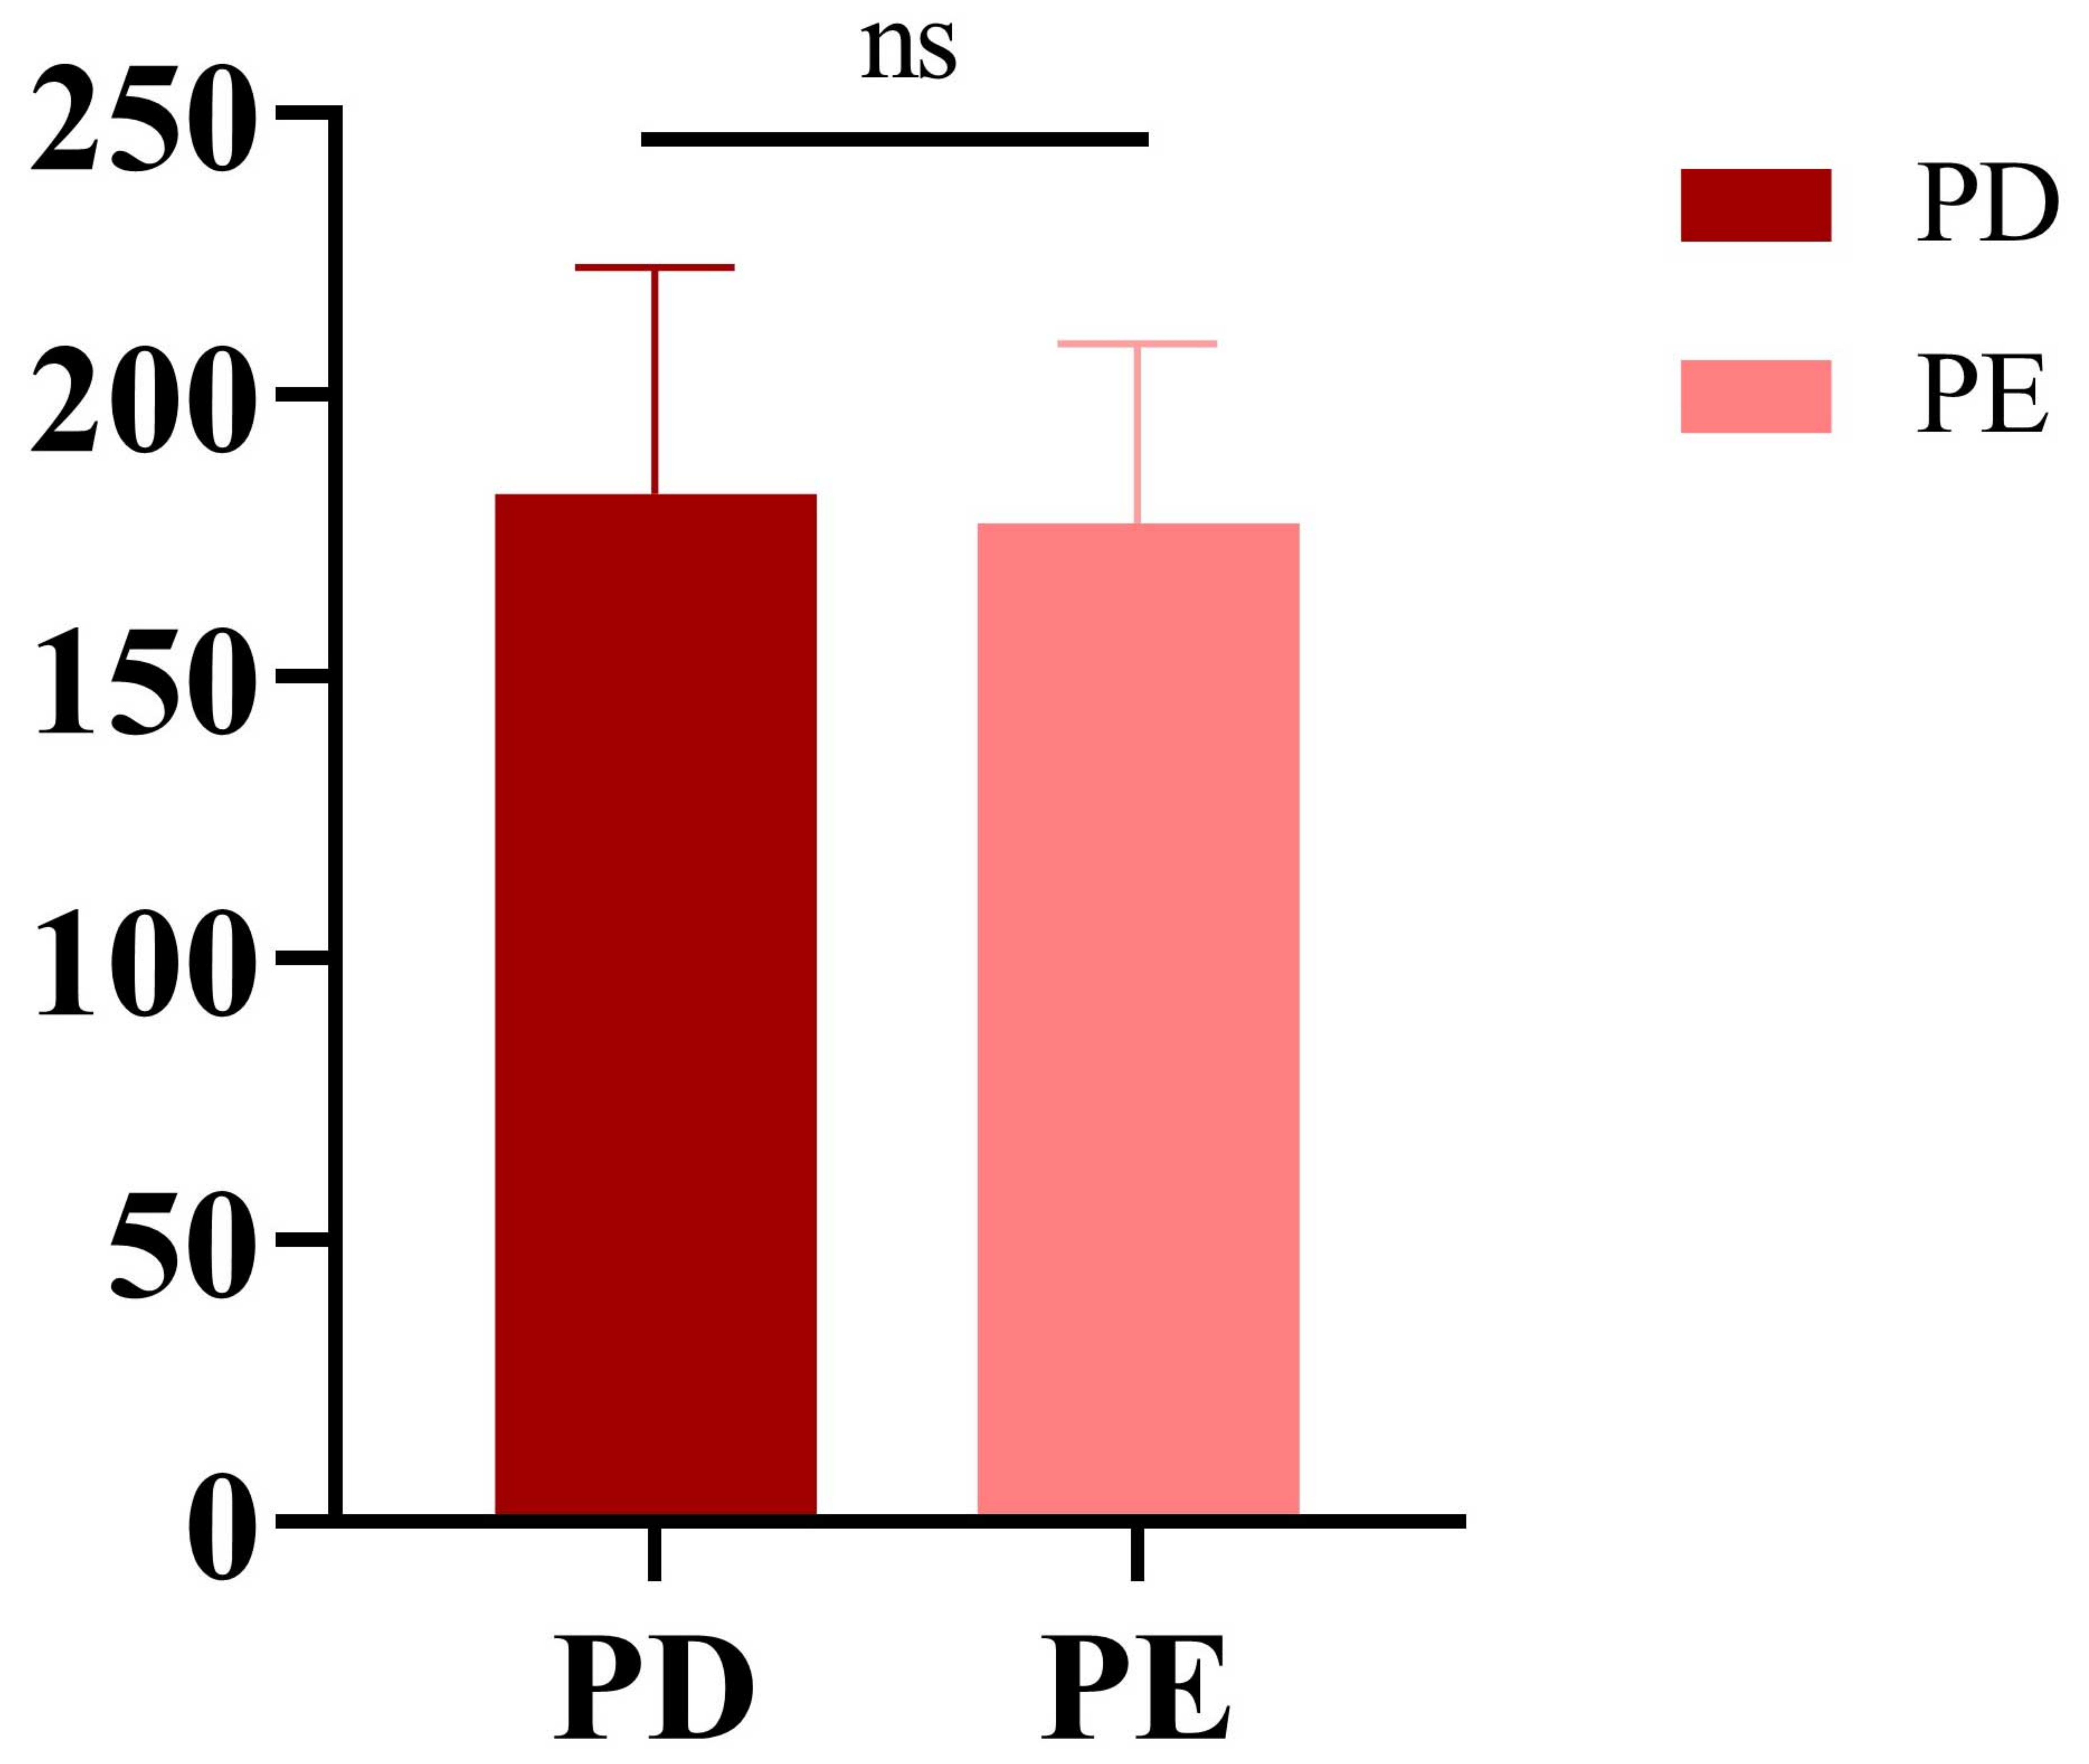

Supplement: 41598_2024_63045_MOESM2_ESM.pdf [file 41598_2024_63045_MOESM2_ESM.pdf]
