# Supplementary material for: Aerobic exercise improves motor dysfunction in Parkinson's model mice via differential regulation of striatal medium spiny neuron
Source: PubMed Central journal article supplement (PMC11130133; doi:10.1038/s41598-024-63045-4), 2024-05-27
Supplement: 41598_2024_63045_MOESM4_ESM.pdf [file 41598_2024_63045_MOESM4_ESM.pdf]

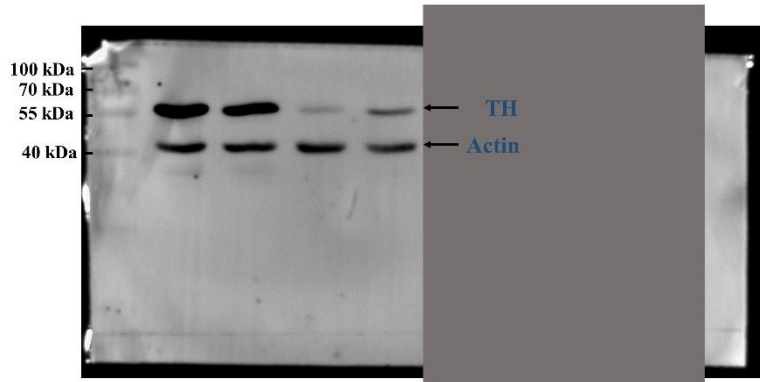

Note: Obscured positions are unpublished experimental data.

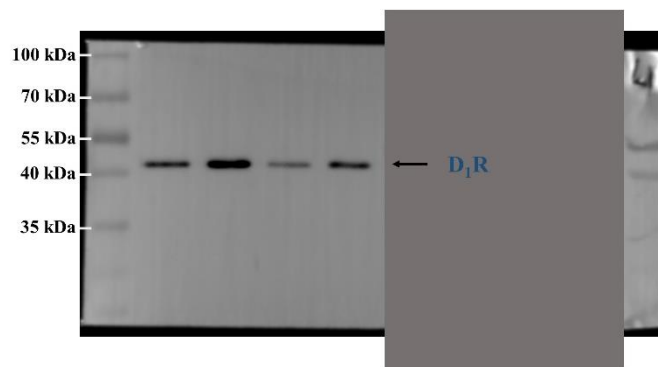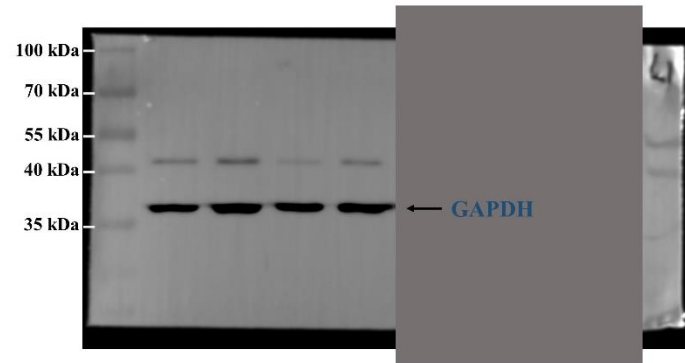

Note: Obscured positions are unpublished experimental data.

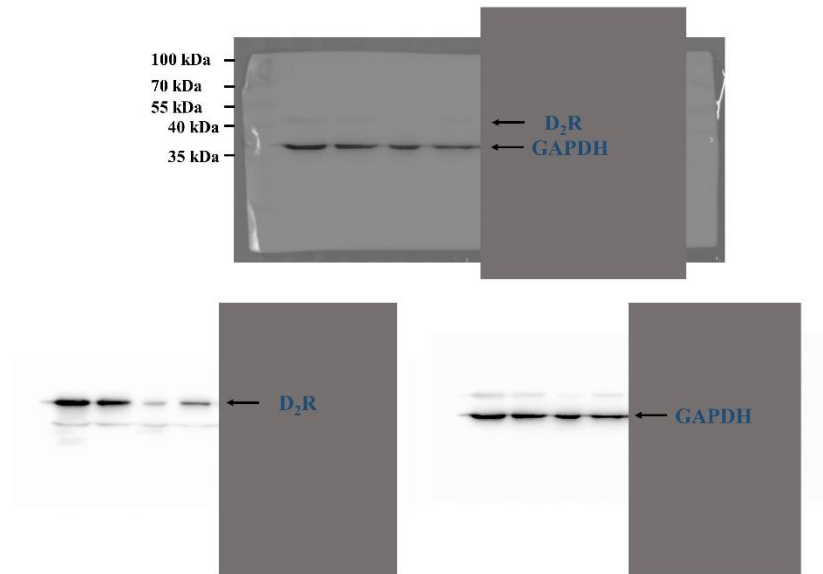

Note: Obscured positions are unpublished experimental data. In addition, the top image shows a schematic representation of the protein locations, and the bottom image shows the protein images used in the manuscript.
